# Supplementary material for: Carbon monoxide solubility in ionic liquids: determination, prediction and relevance to hydroformylationElectronic supplementary information (ESI) available: further experimental details. See http://www.rsc.org/suppdata/cc/b4/b401537a/
Source: Royal Society of Chemistry journal article supplement (doi:10.1039/b401537a), 2004-01-01
Supplement: b401537a.doc [file b401537a.doc]

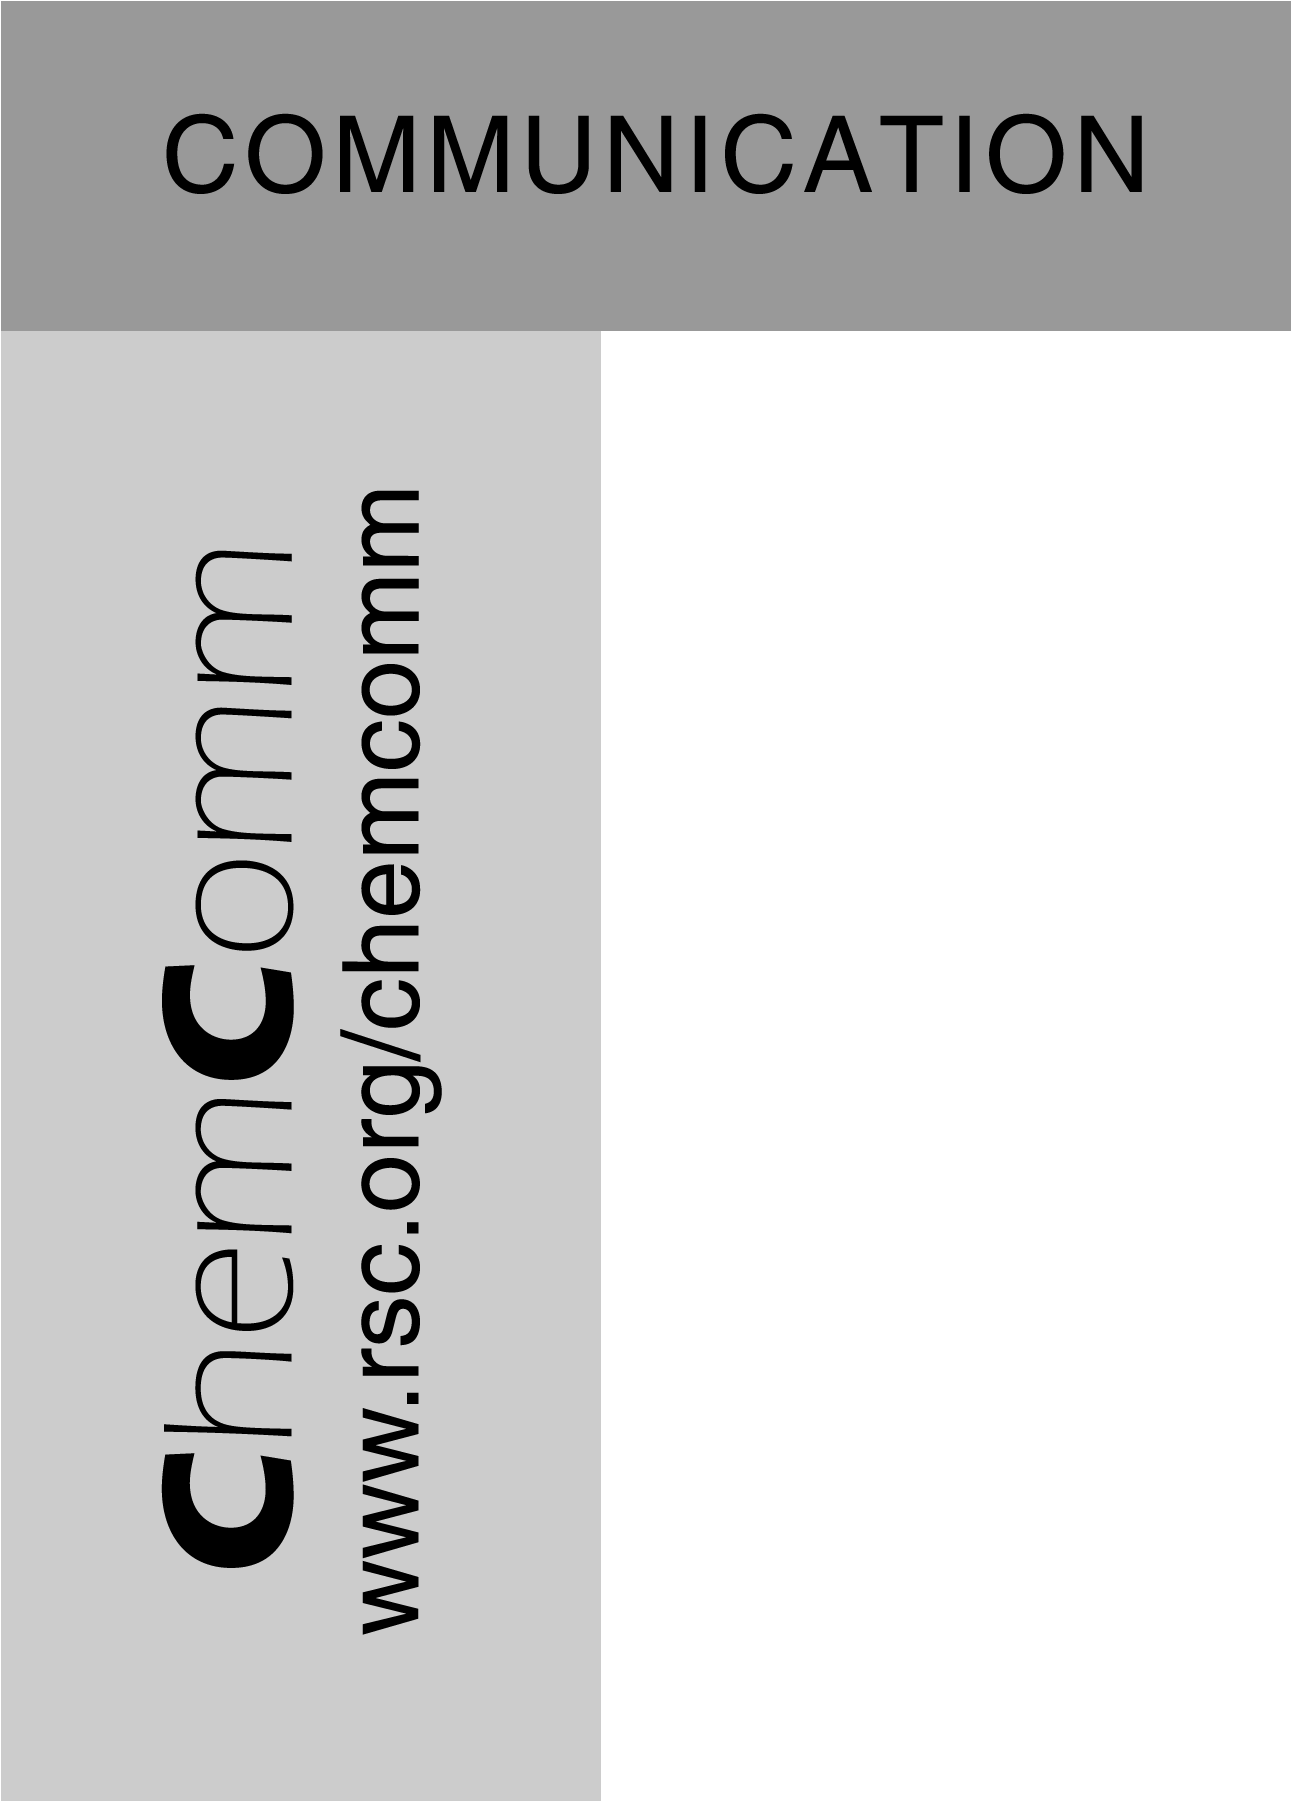
Carbon monoxide solubility in ionic liquids: determination, prediction and relevance to hydroformylation.

C. André Ohlin, Paul J. Dyson, Gábor Laurenczy*

Institut des Sciences et Ingénerie Chimiques (ISIC), Ecole Polytechnique Fédérale de Lausanne, EPFL-BCH, CH-1015 Lausanne, Switzerland. E-mail gabor.laurenczy@epfl.ch

This submission was created using the RSC ChemComm Template (DO NOT DELETE THIS TEXT)

(LINE INCLUDED FOR SPACING ONLY - DO NOT DELETE THIS TEXT)

**Supporting information**

Figure 1. 13C T1 values (in seconds) for carbon monoxide in four different ionic liquids, and for the ionic liquids (15 s delay period was used in solubility measurements).

Figure 2. Mole fraction *vs* pressure (bar) for 1-butyl-3-methylimidazolium bis(trifluoromethylsulfonyl)imide at 295 K.

Figure 3. ln(CO) *vs* 1/T for 1-butyl-3-methylimidazolium bis(trifluoromethylsulfonyl)imide.

Figure 4. ln(CO) *vs* 1/T for 1-butyl-1-methylpyrrolidinium bis(trifluoromethylsulfonyl)imide.

Table 1. Mole fractions at different partial pressures for 1-butyl-3-methylimidazolium bis(trifluoromethylsulfonyl)imide at 295 K.

Table 2. Observed densities and spectral data for the ionic liquids used in the study

Table 3. 1/T, ln(CO) values, and enthalpies for [bmpy][Tf2N] (cation 7, R=-C4H9) and [bmim][Tf2N] (cation 1, R=-C4H9) at 1 bar.

Table 4.  values for a selection of ionic liquids.

Table 5. Kamlet-Taft parameters, and literature values for CO solubility.

Figure 1. 13C T1 values (in seconds) for carbon monoxide in four different ionic liquids, and for the ionic liquids.

Figure 2. Mole fraction *vs* pressure (bar) for 1-butyl-3-methylimidazolium bis(trifluoromethylsulfonyl)imide at 295 K. R2=0.997, =3.11.10-3.

Table 1. Mole fractions at different partial pressures for 1-butyl-3-methylimidazolium bis(trifluoromethylsulfonyl)imide at 295 K.

| **PCO (bar)** | **CO** |
| --- | --- |
| 1* | 1.03.10-3 |
| 26 | 33.7.10-3 |
| 40 | 47.0.10-3 |
| 54 | 57.0.10-3 |
| 70 | 73.7.10-3 |
| 93 | 101.0.10-3 |

*Obtained at 1 bar using 13C labeled carbon monoxide.

Table 2. Observed densities and spectral data for the ionic liquids used in the study

| **Entry** | **Cation** | **-R** | **Anion** | ** (g/cm3)** | **13C NMR (ppm)** | **FTIR (cm-1)** | **KH (kbar)a** | **[CO] (mM)b** |
| --- | --- | --- | --- | --- | --- | --- | --- | --- |
| 1 | 1 | -CH3 | [BF4]- | 1.373 | 136.72 (d, J=221.7 Hz), 122.70 (d, J=204.0 Hz), 34.88 (q, J=144.0 Hz) | 3171(m), 3132(m), 2971(w), 1580(s), 1457(w), 1178(s), 1058(br s). | 8.05 | 0.93 |
| 2 | 1 | -C2H5 | [BF4]- | 1.418 | 134.15 (d, J=220.1 Hz), 120.87 (d, J=204.0 Hz), 119.34 (d, J=200.8 Hz), 42.09 (t, J=144.6 Hz), 33.44 (q, J=144.0 Hz), 12.43 (q, J=128.5 Hz) | 3159(w), 3068(m), 2987(w), 1575(s), 1464(w), 1173(s), 1060(s) | 6.67 | 1.07 |
| 3 | 1 | -C4H9 | [BF4]- | 1.213 | 134.04 (d, J=221.7 Hz), 120.94 (d, J=207.2 Hz), 119.63 (d, J=204.0 Hz), 46.50 (t, J=143.8 Hz), 32.93 (q, J=144.0 Hz), 28.99 (t, J=126.1 Hz), 16.38 (t, J=122.9 Hz), 10.19 (q, J=124.2 Hz) | 3164(m), 3123(w), 2965(m), 2939(w), 2878(w), 1576(m), 1468(w), 1172(m), 1061(s) | 3.37 | 1.59 |
| 4 | 1 | -C6H13 | [BF4]- | 1.177 | 134.05 (d, J=223.3 Hz), 120.90 (d, J=204.0 Hz), 119.61 (d, J=208.8 Hz), 46.83 (t, J=143.7 Hz), 32.97 (q, J=144.0 Hz), 28.34 (t, J=127.2 Hz), 27.19 (t, J=127.7 Hz), 22.91 (t, J=126.1 Hz), 19.62 (t, J=123.7 Hz), 10.94 (q, J=122.6 Hz) | 3162(m), 3122(w), 2958(m), 2933(m), 2862(w), 1575(m), 1468(m), 1171(s), 1059(br s) | 2.88 | 1.61 |
| 5 | 5 | -C8H17 | [BF4]- | 1.133 | 142.87 (d, J=174.0), 141.23 (d, J=183.5), 138.57 (d, J=184.7), 136.73 (s), 124.52 (d, J=172.0), 58.54 (t, J=145.3), 51.01 (s), 28.48 (t, J=131.5), 28.10 (t, 127.3), 25.78 (t, J=127.2), 25.70 (t, J=126.9), 22.76 (t, J=126.0), 19.34 (t, J=125.7), 14.56 (q, J=124.3), 10.64 (q, J=123.3) | 3079(w), 2929(m), 2858(m), 1507(m), 1468(w), 1063(s) | 1.91 | 2.02 |
| 6 | 1 | -CH3 | [Tf2N]- | 1.579 | 136.09 (d, J=221.7 Hz), 122.68 (d, J=202.4 Hz), 119.07 (q, J=320.2 Hz), 34.77 (q, J=144.0 Hz) | 3169(w), 3132(w), 1578(m), 1353(s), 1199(s), 1141(s), 1058(m) | 1.34 | 3.13 |
| 7 | 1 | -C2H5 | [Tf2N]- | 1.542 | 134.04 (d, J=221.7 Hz), 121.72 (d, J=202.4 Hz), 119.00 (d, J=202.4 Hz), 118.16 (q, J=320.7 Hz), 43.08 (t, J=144.6 Hz), 33.84 (q, J=144.0 Hz), 12.50 (q, J=128.5 Hz) | 3161(w), 3124(w), 2994(w), 1575(w), 1456(w), 1432(w), 1352(s), 1195(s), 1141(m), 1058(s) | 1.18 | 3.30 |
| 8 | 1 | -C4H9 | [Tf2N]- | 1.433 | 134.25 (d, J=220.0 Hz), 121.66 (d, J=202.4 Hz), 120.41 (d, J=202.4 Hz), 118.12 (q, J=320.7 Hz), 47.66 (t, J=143.8 Hz), 33.82 (q, J=142.0 Hz), 29.84 (t, J=127.7 Hz), 17.17 (t, J=124.5 HZ), 10.73 (q, J=125.3 Hz) | 3158 (w), 3122(w), 2968(w), 2881(w), 1575(w), 1465(w), 1432(s), 1352(s), 1195(s), 1140(m), 1058(s) | 0.95 | 3.60 |
| 9 | 1 | -C6H13 | [Tf2N]- | 1.378 | 133.20 (d, J=220.0 Hz), 120.65 (d, J=204.0 Hz), 119.39 (d, J=202.4 Hz), 117.13 (q, J=320.7), 46.92 (t, J=143.8 Hz), 32.81 (q, J=143.0 Hz), 27.94 (t, J=127.7 Hz), 26.94 (t, J=127.7 Hz), 22.63 (t, J=127.7 Hz), 19.21 (t, J=124.5 Hz), 10.38 (q, J=123.1 Hz) | 3157(w), 3121(w), 2961(w), 2936(w), 2864(w), 1575(w), 1470(w), 1352(m), 1195(s), 1137(m), 1058(m) | 0.76 | 3.92 |
| 10 | 1 | -C8H17 | [Tf2N]- | 1.337 | 133.05 (d, J=221.7 Hz), 120.51 (d, J=202.4 Hz), 119.25 (d, J=204.0 Hz), 116.93 (q, J=321.2 Hz), 46.75 (t, J=143.0 Hz), 32.65 (q, J=144.0 Hz), 28.35 (t, 121.3 Hz), 26.88 (t, J=127.7 Hz), 25.79 (t, 129.3 Hz), 22.92 (t, J=122.9 Hz), 10.46 (q, J=123.1 Hz) | 3157(w), 3121(w), 2932(m), 2860(w), 1734(w), 1575(w), 1469(w), 1431(w), 1352(s), 1196(s), 1137(s), 1058(s) | 0.67 | 4.20 |
| 11 | 1 | -C7H7 | [Tf2N]- | 1.493 | 137.13 (s), 134.84 (d, J=231.3 Hz), 130.93 (d, J=162.2 Hz), 128.34 (d, J=162.2 Hz), 127.74 (d, J=159.0 Hz), 123.06 (d, J=202.4 Hz), 121.06 (d, J=200.8 Hz), 119.09 (q, J=320.7 Hz), 51.89 (t, J=143.7 Hz), 34.77 (q, J=143.5 Hz) | 3156(w), 3118(w), 1575(m), 1564(m), 1499(w), 1458(m), 1430(w), 1353(s), 1199(s), 1140(s), 1057(s) | 1.41 | 2.33 |
| 12 | 2 | -C2H5 | [Tf2N]- | 1.513 | 141.19 (s), 119.26 (d, J=202.4 Hz), 117.06 (d, J=202.4 Hz), 117.01 (q, J=320.7 Hz), 40.45 (t, J=143.8 Hz), 31.54 (q, J=143.0 Hz), 11.16 (q, J=128.5 Hz), 5.65 (q, J=132.2 Hz) | 3161(w), 3124(w), 2994(w), 1575(w), 1352(s), 1195(s), 1141(m), 1058(s) | 1.36 | 2.75 |
| 13 | 2 | -C4H9 | [Tf2N]- | 1.421 | 143.91 (s), 121.8 (d, J=202.4 Hz), 120.38 (d, J=205.6 Hz), 119.61 (q, J=320.7 Hz), 47.81 (t, J=142.1 Hz), 34.18 (q, J=143.5 Hz), 30.97 (t, J=127.7 Hz), 18.71 (t, J=124.5 Hz), 12.45 (q, J=125.3 Hz), 8.40 (q, J=132.8 Hz) | 3151(w), 2968(w), 2880.55(w), 1352(s), 1195(s), 1138(m), 1058(s) | 1.04 | 3.14 |
| 14 | 3 | -C2H5 | [Tf2N]- | 1.551 | 142.94 (d, J=171.4 Hz), 141.50 (d, J=190.6), 125.80 (d, J=175.4 Hz), 117.25 (q, J=320.13 Hz), 54.87 (t, J=146.6 Hz), 12.96 (q, J=129.8 Hz) | 3141(w), 3096(w), 2993(w), 1637(m), 1491(m), 1352(s), 1332(m), 1195(s), 1138(m), 1058(s) | 1.55 | 2.58 |
| 15 | 3 | -C4H9 | [Tf2N]- | 1.449 | 143.06 (d, J=171.9 Hz), 141.87 (d, J=191.1 Hz), 125.76 (d, J=171.9 Hz), 117.34 (q, J=320.7 Hz), 59.37 (t, J=145.4 Hz), 30.35 (t, J=127.7 Hz), 16.35 (t, J=126.1 Hz), 10.02 (q, J=124.7 Hz) | 3139(w), 3095(w), 3075(w), 2970(w), 2942(w), 2881(w), 1637(m), 1490(m), 1353(s), 1333(m), 1195(s), 1138(m), 1058(s) | 1.14 | 3.05 |
| 16 | 3 | -C6H13 | [Tf2N]- | 1.430 | 143.10 (d, J=170.3 Hz), 141.94 (d, J=191.1 Hz), 125.87 (d, J=176.7 Hz), 117.39 (q, J=320.7 Hz), 59.65 (t, J=145.4 Hz), 28.59 (t, J=129.3 Hz), 28.24 (t, J=129.3 Hz), 22.82 (t, J=127.7 Hz), 19.48 (t, J=124.5 Hz), 10.71 (q, J=123.7 Hz) | 3139(w), 3095(w), 3074(w), 2961(w), 2936(w), 2865(w), 1637(w), 1490(m), 1352(s), 1333(m), 1195(s), 1138(m), 1058(s) | 0.94 | 3.41 |
| 17 | 3 | -C8H17 | [Tf2N]- | 1.364 | 143.41 (d, J=169.0 Hz), 142.27 (d, J=190.6 Hz), 126.18 (d, J=172.2 Hz), 117.7 (q, J=320.9 Hz), 59.99 (t, J=145.4 Hz), 29.23 (t, J=123.4 Hz), 29.05 (t, J=129.8 Hz), 26.49 (t, J=127.0), 23.55 (t, J=126.6 Hz), 20.10 (t, J=123.4 Hz), 11.30 (q, J=124.2 Hz) | 3138(w), 3094(w), 3074(w), 2932(w), 2861(w), 1637(m), 1490(m), 1352(s), 1333(m), 1196(s), 1138 (m), 1058(s). | 0.82 | 3.52 |
| 18 | 3 | -C7H7 | [Tf2N]- | 1.516 | 145.26 (d, J=171.9 Hz), 143.36 (d, J=192.7 Hz), 131.90 (s), 129.33 (d, J=162.2 Hz), 128.92 (d, J=162.2 Hz), 128.41 (d, J=159.01 Hz), 127.80 (d, J=175.1 Hz), 119.30 (q, J=320.7 Hz), 63.97 (t, J=146.2 Hz) | 3136(w), 3094(w), 3070(w), 1634(m), 1489(m), 1353(s), 1198(s), 1139(m), 1057(s) | 1.38 | 2.40 |
| 19 | 4 | -C2H5 | [Tf2N]- | 1.521 | 152.65 (s), 142.27 (d, J=170.3 Hz), 141.73 (d, J=189.5 Hz), 127.80 (d, J=175.1 Hz), 123.19 (d, J=173.5 Hz), 117.23 (q, J=320.7 Hz), 50.92 (t, J=145.4 Hz), 16.59 (q, J=131.2 Hz), 11.85 (q, J=129.6 Hz ) | 3097(w), 2995(w), 1635(m), 1353(s), 1332(m), 1195(s), 1138(m), 1057(s) | 1.62 | 2.34 |
| 20 | 4 | -C4H9 | [Tf2N]- | 1.440 | 152.71 (s), 142.34 (d, J=173.5 Hz), 142.29 (d, J=184.7 Hz), 127.88 (d, J=173.5 Hz), 123.06 (d, J=170.3 Hz), 117.30 (q, J=320.7 Hz), 55.43 (t, J=144.6 Hz), 29.09 (126.89 Hz), 16.77 (q, J=131.7 Hz), 16.56 (t, J=126.1 Hz), 10.11 (q, J=125.8 Hz) | 3096(w), 2969(w), 2941(w), 2881(w), 1635(m), 1352(s), 1332(m), 1196(s), 1138(m), 1057(s) | 0.93 | 3.58 |
| 21 | 4 | -C7H7 | [Tf2N]- | 1.474 | 152.8426 (s), 120-130 (multiplets), 117.1101 (q, J=320.7023 Hz), 58.2475 (t, J=145.3600 Hz), 16.9745 (q, J=131.1720 Hz) | 3096(w), 1635(m), 1516(w), 1500(w), 1478(w), 1457(w), 1352(s), 1331(m), 1197(s), 1139(m), 1057(s) | 2.02 | 1.57 |
| 22 | 5 | -C4H9 | [Tf2N]- | 1.472 | 147.62, 145.72, 144.26, 143.19, 141.97, 139.96, 139.44, 127.3078 (d, J=172.6), 119.76 (q, J=320.8705), 61.51 (t, J=144.7), 32.84 (t, J=128.17), 18.78 (t, J=127.3), 17.37 (q, J=130.2), 12.41 (q, J=123.23) | 3077(w), 2969(w), 2941(w), 2881(w), 1637(w), 1353(s), 1194(s), 1138(m), 1058(s) | 0.88 | 3.90 |
| 23 | 5 | -C8H17 | [Tf2N]- | 1.317 | 143.23 (d, J=173.9 Hz), 140.63 (d, J=183.6 Hz), 138.43 ( d, J=184.9 Hz), 137.54 (s), 124.95 (d, J=172.0 Hz), 116.90 (q, J=321.3 Hz), 59.18 (t, J=145.2 Hz), 30.29 (t, 131.6 Hz), 16.25 (t, 126.1 Hz), 15.23 (q, J=130.2 Hz), 10.01 (q, J=123.23 Hz) ppm. | 3075(w), 2932(m), 2861(m), 1637(w), 1507(m), 1469 (w), 1353(s), 1195(s), 1138(m), 1058(s) | 0.90 | 3.03 |
| 24 | 6 | -C2H5 | [Tf2N]- | 1.520 | 157.02 (s), 140.17 (d, J=189.53 Hz), 126.05 (d, J=171.9 Hz), 117.09 (q, J=320.7 Hz), 53.61 (t, J=146.2 Hz), 18.26 (q, J=130.6 Hz), 12.91 (q, J=129.6 Hz) | 3070(w), 2994(w), 1645(m), 1352(s), 1193(s), 1139(m), 1057(s) | 1.26 | 3.00 |
| 25 | 6 | -C4H9 | [Tf2N]- | 1.408 | 158.97 (s), 142.34 (d, J=189.5 Hz), 127.9 (d, J=171.9 Hz), 118.97 (q, J=321.2 Hz), 59.97 (t, J=145.4 Hz), 32.03 (t, J=128.5 Hz), 20.22 (q, J=129.6 Hz), 17.96 (t, J=125.3 Hz), 11.73 (q, J=125.3 Hz) | 3069(w), 2969(w), 2941(w), 2881(w), 1645(m), 1352(s), 1332(m), 1194(s), 1138(m), 1058(s) | 0.92 | 3.55 |
| 26 | 6 | -C8H17 | [Tf2N]- | 1.376 | 140.81 (d, J=189.5 Hz) 126.29 (d, J=173.5 Hz), 117.38 (q, J=321.2 Hz), 58.60 (t, J=143.8 Hz), 28.72 (t, J=129.3 Hz), 26.22 (t, J=125.3 Hz), 23.18 (t, J=128.5 Hz), 19.92 (t, J=118.1 Hz), 18.71 (q, J=130.1 Hz), 10.97 (q, J=123.1 Hz) | 3134(w), 3068(w), 2932(m), 2860(w), 1644(m), 1352(s), 1195(s), 1137(m), 1058(s) | 1.03 | 2.74 |
| 27 | 6 | -C7H7 | [Tf2N]- | 1.505 | 159.58 (s), 141.99 (d, J=189.5 Hz),132.06 (s), 128.92 (d, J=162.2 Hz), 128.62 (d, J=160.6 Hz), 128.04 (d, J=167.0 Hz), 119.06 (q, J=320.7 Hz), 62.67 (t, J=144.6 Hz), 20.24 (q, J=129.0 Hz) | 3067(w), 1642(m), 1519(w), 1498(w), 1476(w), 1458(w), 1352(s), 1197(s), 1136(m), 1057(s) | 1.30 | 2.49 |
| 28 | 8 | -C4H9 | [Tf2N]- | 1.440 | 117.31 (q, J=320.2 Hz), 63.10 (t, J=143.8 Hz), 62.51 (t, J=143.0 Hz), 53.47 (t, J=143.8 Hz), 48.63 (q, J=144.6 Hz), 21.58 (t, J=127.7 Hz), 16.58 (t, J=123.7 Hz), 10.17 (q, J=123.7 Hz) | 3535(m), 2972(w), 2883(w), 1484(m), 1352(s), 1198(s), 1140(m), 1057(s) | 1.24 | 2.72 |
| 29 | 8 | -C8H17 | [Tf2N]- | 1.306 | 117.29 (q, J=320.7 Hz), 63.36 (t, J=143.8), 62.56 (t, J=143.8), 53.42 (t, J=142.95 Hz), 48.63 (q, J=144.6 Hz), 28.88 (t, J=130.9 Hz), 26.30 (t, J=129.3 Hz), 23.37 (t, J=126.9 Hz), 19.82 (t, J=124.5 Hz), 11.02 (q, J=123.1 Hz) | 3536(m), 2959(w), 2932(m), 2861(m), 1471(m), 1352(s), 1198(s), 1140(m), 1058(s) | 0.94 | 2.87 |
| 30 | 9 | -C2H5 | [Tf2N]- | 1.484 | 119.36 (q, J=320.2 Hz), 76.36 (d, J=144.6 Hz), 56.63 (t, J=143.8 Hz), 51.64 (q, J=144.0 Hz), 17.20 (q, J=129.3 Hz), 9.82 (q, J=126.4 Hz) | 3540(s), 3060(w), 2984(w), 1488(m), 1419(w), 1352(s), 1199(s), 1140(m), 1057(s) | 1.48 | 2.44 |
| 31 | 7 | -C4H9 | [Tf2N]- | 1.387 | 118.85 (q, J=321.2), 62.99 (t, J=146.2 Hz), 46.64 (q, J=143.5 Hz), 24.16 (t, J=126.1 Hz), 20.03 (t, J=136.5 Hz), 18.14 (122.9 Hz), 18.14 (t, J=122.9 Hz), 11.60 (q, J=124.2 Hz) | 2970(w), 2882(w), 1467(m), 1353(s), 1195(s), 1139(m), 1057(s) | 3.26 | 3.06 |
| 32 | 7 | -C7H7 | [Tf2N]- | 1.441 | 132.93 (s), 129.78 (d, J=162.2 Hz), 128.47 (d, J=139.7 Hz), 128.30 (d, J=157.4 Hz), 119.05 (q, J=320.7 Hz), 65.27 (t, J=152.4 Hz), 62.27 (t, J=150.2 Hz), 46.30 (q, J=144.6 Hz), 19.78 (t, J=136.5 Hz) | 3040(w), 1478(w), 1464(m), 1430(w), 1353(s), 1198(s), 1139(m), 1057(s) | 2.79 | 1.13 |
| 33 | 1 | -C4H9 | [PF6]- | 1.363 | 135.51 (d, J=221.7 Hz), 122.72 (d, J=204.0 Hz), 121.40 (d, J=202.4 Hz), 48.67 (t, J=143.8 Hz), 34.91 (q, J=144.0 Hz), 30.85 (t, J=130.9 Hz), 18.30 (t, J=124.5 Hz), 12.09 (q, J=124.7 Hz) | 3172(m), 3126(w), 2967(m), 2940(w), 2879(w), 1576(m), 1468(w), 1170(s), 1114(w) | 3.27 | 1.47 |
| 34 | 1 | -C4H9 | [SbF6]- | 1.699 | 135.43 (d, J=220.0), 122.97 (d, J=202.4 Hz), 121.66 (d, J=202.38 Hz), 49.13 (t, J=143.8 Hz), 35.16 (q, J=143.5 Hz), 31.18 (t, J=127.7 Hz), 18.65 (t, J=124.5 Hz), 12.33 (q, J=124.2 Hz) | 3169(w), 3124(w), 2967(w), 2940(w), 2879(w), 1576(m), 1465(w), 1431(w), 1168(s), 1111(w) | 2.01 | 2.25 |
| 35 | 1 | -C4H9 | [CF3CO2]- | 1.198 | 159.77 (q, J2=32.1 Hz), 137.43 (d, J=221.7 Hz), 123.67 (d, J=202.4 Hz), 122.41 (d, J=210.4 Hz), 117.3 (q, J=297.7 Hz), 48.71 (t, J=143.8 Hz), 35.30 (q, J=143.5 Hz), 31.63 (t, J=122.1 Hz), 18.74 (t, J=124.5 Hz), 12.49 (q, J=123.1 Hz) | 3148 (w), 3088(m), 2966(m), 2878(w), 1689(s), 1575(w), 1200(s), 1171(s), 1123(m) | 1.91 | 2.49 |
| 36 | 7 | -C4H9 | [CF3CO2]- | 1.195 | 159.56 (q, J2=30.8 Hz), 117.92 (q, J=298.8), 63.62 (t, J=146.5 Hz), 47.38 (q, J=143.6 Hz), 25.49 (t, 126.4 Hz), 21.38 (t, J=136.0 Hz), 19.68 (t, J=23.8 Hz), 13.20 (q, J=123.8 Hz) | 2968(m), 2880(w), 1689(s), 1471(m), 1397(w), 1199(s), 1163(m), 1117(m), 1006(m) | 6.48 | 0.66 |
| 37 | 5 | -C4H9 | [N(CN)2]- | 1.062 | 146.00 (d, J=168.6 Hz), 145.10 (d, J=133.3 Hz), 141.21 (146.2 Hz), 127.53 (d, J=173.5 Hz), 119.36 (s), 61.31 (t, J=145.4 Hz), 33.11 (t, J=129.3 Hz), 19.45 (t, J=1197 Hz), 18.19 (q, J=126.35 Hz), 13.44 (q, J=123.1 Hz) | 3057(w), 2964(w), 2876(w), 2234(m), 2195(m), 2134(s), 1635(w), 1506(m), 1311(m) | 3.99 | 1.23 |

**Table 3.** 1/T, ln(CO) values, and enthalpies for [bmpy][Tf2N] (cation 7, R=-C4H9) and [bmim][Tf2N] (cation 1, R=-C4H9) at 1 bar.

| **1/T** | **[bmim][Tf2N]** | **[bmpy][Tf2N]** |
| --- | --- | --- |
| **ln(CO)** | **ln(CO)** |
| 3.38.10-3 | -2.38 | -6.98 |
| 3.19.10-3 | -2.43 | -7.02 |
| 3.00.10-3 | -2.49 | -7.06 |
| 2.83.10-3 | -2.51 | -7.08 |
| **Slope** | 246± 17 | 185± 15 |
| **H (kJ/mol)** | -2.0 ± 0.l | -1.5± 0.1 |

**Figure 3**. ln(CO) *vs* 1/T for [bmim][Tf2N]. R2=0.99.

**Figure 4**. ln(CO) *vs* 1/T for [bmpy][Tf2N]. R2=0.99.

**Table 4.**  values for a selection of ionic liquids. R2=0.99.

| Cation | -R | Anion | a | b | c | d | [CO]/mM | [CO]pred/mMa |
| --- | --- | --- | --- | --- | --- | --- | --- | --- |
| **1** | **-C4H9** | **[Tf2N]-** | **44.78** | **51.23** | **17.88** | **98.33** | **3.60** | **3.57** |
| **2** | **-C4H9** | **[Tf2N]-** | **44.53** | **51.31** | **17.99** | **98.24** | **3.14** | **3.02** |
| **3** | **-C4H9** | **[Tf2N]-** | **44.81** | **51.26** | **18.00** | **98.30** | **3.05** | **3.02** |
| **1** | **-C7H7** | **[Tf2N]-** | **44.49** | **51.28** | **18.01** | **98.44** | **2.40** | **2.62** |
| **1** | **-C4H9** | **[SbF6]-** | **44.54** | **50.78** | **18.04** | **98.61** | **2.25** | **2.16** |
| **7** | **-C4H9** | **[CF3CO2]-** | **44.84** | **53.39** | **18.53** | **98.37** | **0.66** | **0.68** |
| **5** | **-C4H9** | **[C(CN)2]-** | **44.76** | **52.40** | **18.52** | **97.9** | **1.23** | **1.13** |
| **5** | **-C8H17** | **[BF4]-** | **44.85** | **51.46** | **18.28** | **97.94** | **2.02** | **2.15** |

a Predicted solubility

Table 5. Kamlet-Taft parameters,7 and literature values for CO solubility.4

| Solvent |  |  |  | [CO]/mM (Lit.) |
| --- | --- | --- | --- | --- |
| Hexane | -0.08 | 0.04 | 0.00 | 13.60 |
| CCl4 | 0.28 | 0.00 | 0.00 | 8.99 |
| 1-Butanol | 0.47 | 0.88 | 0.79 | 6.82 |
| iPrOH | 0.48 | 0.48 | 0.76 | 7.90 |
| Toluene | 0.54 | 0.11 | 0.00 | 7.40 |
| Benzene | 0.59 | 0.11 | 0.00 | 7.36 |
| Methanol | 0.73 | 0.61 | 1.05 | 9.40 |
| 1,2-dichloroethane | 0.81 | 0.00 | 0.00 | 5.99 |
| Pyridine | 0.87 | 0.64 | 0.00 | 4.79 |
| Nitrobenzene | 1.01 | 0.39 | 0.00 | 3.65 |
| Water | 1.13 | 1.16 | 0.50 | 1.14 |
